# Supplementary material for: Determination of moxifloxacin in milk using a ratiometric fluorescent sensor based on Ag-MOF@curcumin
Source: Royal Society of Chemistry journal article supplement (doi:10.1039/d4ra00906a), 2024-01-01
Supplement: d4ra00906a1.pdf [file d4ra00906a1.pdf]

## Supplementary Information

### **Determination of Moxifloxacin in milk using a ratiometric fluorescent sensor based on Ag-MOF@curcumin**

*Jiaying Zhao<sup>a,b</sup>, Kedan Wang<sup>b</sup>, Yu Song<sup>b</sup>, Lu Li<sup>a</sup>, Fan Yang<sup>b,c</sup>, Lijuan Zhao<sup>a</sup>, Qihui  
Wang<sup>b\*</sup> and Guowei Deng<sup>b\*</sup>*

*<sup>a</sup> College of Chemistry and Materials Science, Sichuan Normal University, Chengdu  
610068, Sichuan, China;*

*<sup>b</sup> College of Chemistry and Life Science, Sichuan Provincial Key Laboratory for Str  
uctural Optimization and Application of Functional Molecules, Chengdu Normal U  
niversity, Chengdu, 611130, China;*

*<sup>c</sup> Sichuan Provincial Engineering Laboratory of Livestock Manure Treatment and  
Recycling, Sichuan Normal University, Chengdu 610068, Sichuan, China.*

\* Corresponding author

E-mail address for Corresponding authors:

Qihui Wang: [guoguo515@126.com](mailto:guoguo515@126.com)

Guowei Deng: [guoweideng86@163.com](mailto:guoweideng86@163.com)

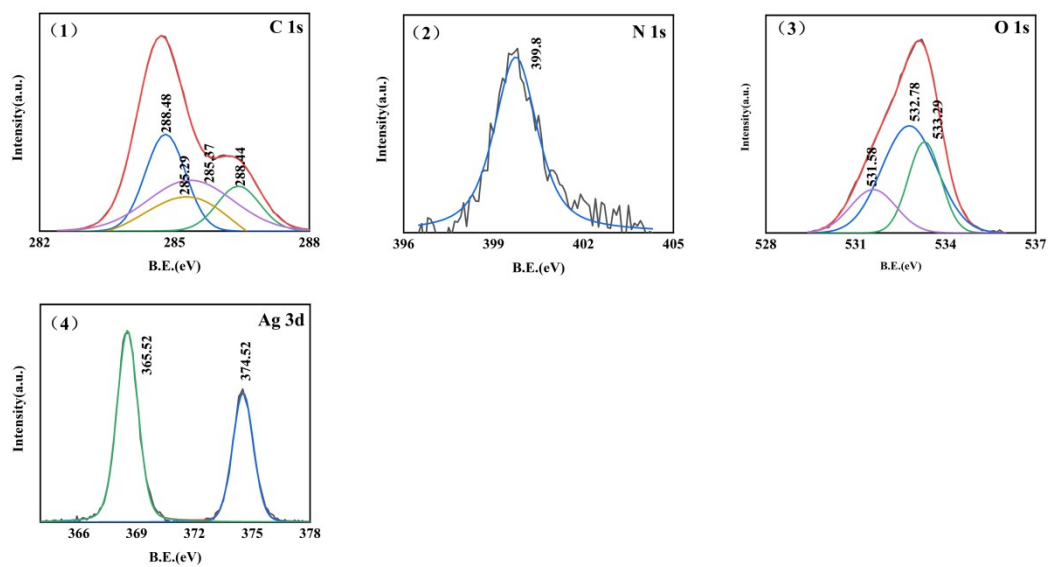

**Fig. S1** C1s, Ag3d, O1s and N1s spectra of AgMOF@Curcumin.

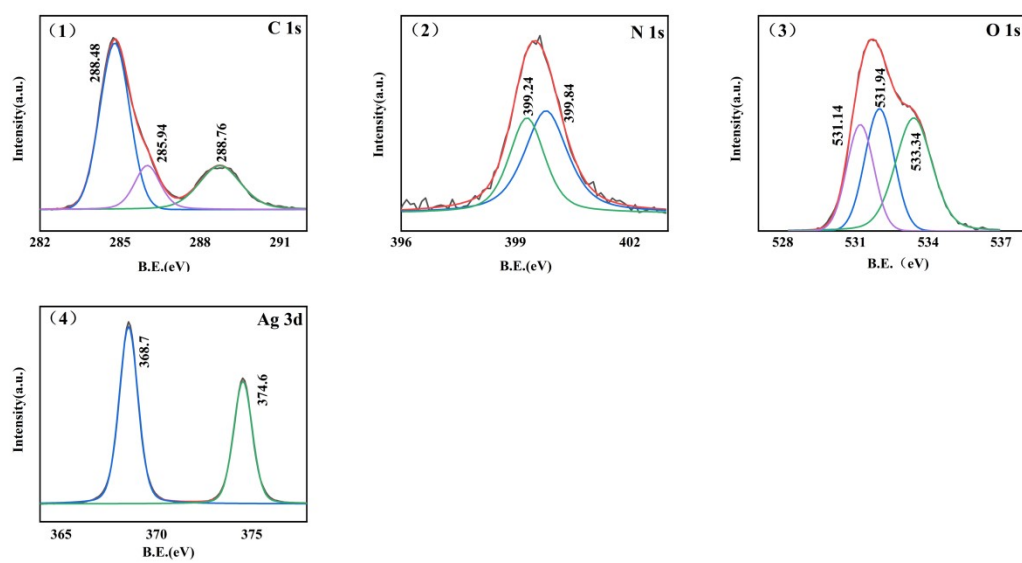

**Fig. S2** C1s, Ag3d, O1s and N1s spectra of AgMOF.

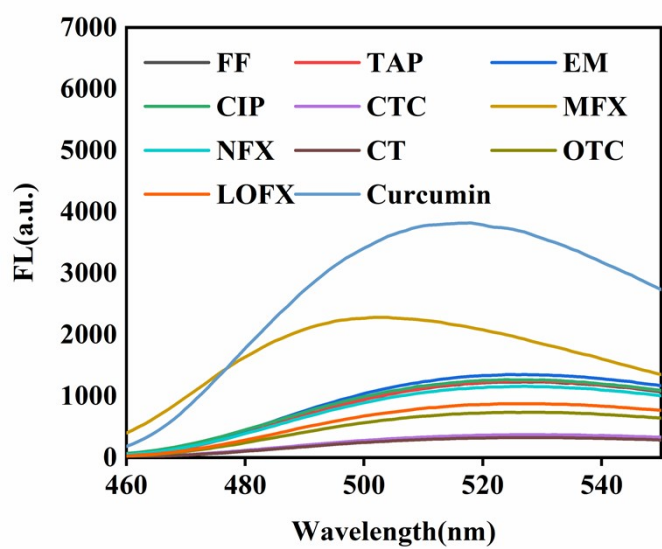

**Fig. S3** The selectivity of curcumin towards several antibiotics

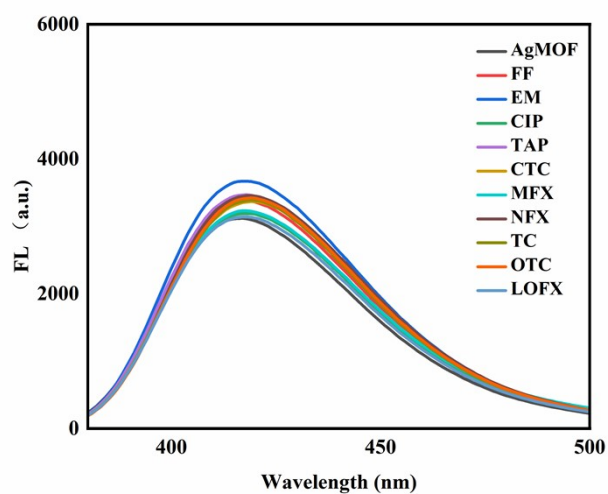

**Fig. S4** The selectivity of Ag-MOF towards several antibiotics.

**Table S1** Compared to other literature reports.

| Method                 | Concentration range                           | LOD                                     | Reference |
|------------------------|-----------------------------------------------|-----------------------------------------|-----------|
| Solid-Contact ISEs     | $1 \times 10^{-6}$ M and $1 \times 10^{-2}$ M |                                         | [1]       |
| UPLC-MS/MS             |                                               | 0.1875 mg/L                             | [2]       |
| RP-HPLC                | 2.5-100 $\mu$ g/ mL                           | 0.51 $\mu$ g/mL                         | [3]       |
| Electrochemical sensor | 0.02 $\mu$ M-2.5 $\mu$ M                      | 0.001 $\mu$ M                           | [4]       |
| Fluorescence           | 0.025 $\mu$ M-15.0 $\mu$ M                    |                                         | [5]       |
| Fluorescence           | $3.3 \times 10^{-7}$ - $2 \times 10^{-6}$ M   |                                         | [6]       |
| Fluorescence           | 0-35 $\mu$ mol $\cdot$ L <sup>-1</sup>        | 0.179 $\mu$ mol $\cdot$ L <sup>-1</sup> | This work |

## References

1. Li, Z.; Zhang, J.; Sun, Q.; Shi, W.; Tao, T.; Fu, Y., Moxifloxacin detection based on fluorescence resonance energy transfer from carbon quantum dots to moxifloxacin using a ratiometric fluorescence probe. *New J. Chem.* **2022**, *46* (9), 4226-4232.
2. Hösl, J.; Gessner, A.; El-Najjar, N., Liquid chromatography-tandem mass spectrometry for the quantification of moxifloxacin, ciprofloxacin, daptomycin, caspofungin, and isavuconazole in human plasma. *Journal of Pharmaceutical and Biomedical Analysis* **2018**, *157*, 92-99.
3. Abdel-Gawad, S. A.; Arab, H. H.; Albassam, A. A., Potentiometric Determination of Moxifloxacin by Solid-Contact ISEs in Wastewater Effluents. *Chemosensors* **2022**, *10* (4), 146.
4. Momin, M. A. M.; Thien, S. J.; Krittaphol, W.; Das, S. C., Simultaneous HPLC assay for pretomanid (PA-824), moxifloxacin and pyrazinamide in an inhaler formulation for drug-resistant tuberculosis. *Journal of Pharmaceutical and Biomedical Analysis* **2017**, *135*, 133-139.

5. Rabie, E. M.; Shamroukh, A. A.; Assaf, H. F.; Khodari, M., A novel sensor based on calcium oxide fabricated from eggshell waste conjugated with L- serine polymer film modified carbon paste electrode for sensitive detection of moxifloxacin in human serum and pharmaceutical constituents. *Sensors and Actuators A: Physical* **2023**, *356*, 114351.
6. Sajwan, R. K.; Kumar Himanshu, J.; Solanki, P. R., Polyvinyl alcohol-derived-carbon quantum dots based fluorometric “On-Off” probe for moxifloxacin detection in milk and egg samples. *Food Chemistry* **2024**, *439*, 138038.
